# Supplementary material for: Composition assessment of sous vide beef meat by near-infrared spectroscopy based on compact spectrophotometers, multivariate regression, and jack-knife variable selection
Source: Research Square preprint supplement (doi:10.21203/rs.3.rs-7776526/v1), 2025-10-28
Supplement: Supplementary file 1 [file be24f0b9fb9b079f0ca54252.docx]

**SUPPLEMENTARY MATERIAL**

# **Composition assessment of sous vide beef meat by near-infrared spectroscopy based on compact spectrophotometers, multivariate regression, and jack-knife variable selection**

**Débora Rezende FERREIRAa, Edimar Aparecida Filomeno FONTESa,** **Celio PASQUINIb, Maria C. HESPANHOLc, Stella da Silva PEREIRAa, Letícia. P. FOLIc, Kaíque A. M. L. CRUZc**

a Department of Food Science and Technology, Federal University of Viçosa, Av. P. H. Rolfs, s/n, Viçosa, MG, 36570–900, Brazil. e-mails / ORCID: [debora.rezende@ifsudestemg.edu.br/](mailto:debora.rezende@ifsudestemg.edu.br/) <https://orcid.org/0009-0008-4025-6779> / eaffontes@ufv.br / https://orcid.org/0000-0002-4370-8805 /
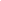
stella.s.pereira@ufv.br

b Institute of Chemistry, State University of Campinas (UNICAMP), Rua Monteiro Lobato, 290, Campinas, SP 13083-862, Brazil. e-mails / ORCID: pasquini@unicamp.br / https://orcid.org/0000-0002-2445-1354

c Group for Analysis and Education for Sustainability, Department of Chemistry, Center for Exact and Technological Sciences, Federal University of Viçosa, Av. P. H. Rolfs, s/n, Viçosa, MG, 36570–900, Brazil. e-mails / ORCID: mariacarmo@ufv.br / https://orcid.org/0000-0003-2296-4516 / leticia_p.folli@hotmail.com / kaique.cruz@non.agilent.com

*Corresponding author address: debora.rezende@ifsudestemg.edu.br

**Table S1.** Variables selected by Jack-Knife – InnoSpectra (nm)

| protein content model | | | | | | | |
| --- | --- | --- | --- | --- | --- | --- | --- |
| 1650.3 | 1654.1 | 1657.8 | 1661.5 | 1665.3 | 1680.5 | 1684.4 | 1688.3 |
| 1692.2 | 1696.1 | 1700.0 | 1723.9 | 1728.0 | 1732.1 | 1736.2 | 1740.3 |
| 1744.4 | 1748.6 | 1761.2 | 1765.4 | 1769.6 | 1773.9 | 1778.2 | 1782.5 |
| 1831.4 | 1883.1 | 1887.9 | 1892.8 | 2116.4 | 2122.5 | 2128.7 | 2160.0 |
| 2166.4 | 2172.8 | 2179.2 | 2185.7 | 2192.2 | 2198.8 | 2232.2 | 2239.0 |
| 2259.7 | 2266.7 | 2273.7 | 2280.7 | 2309.4 | 2376.7 | 2384.4 | 2392.2 |

| water content model | | | | | | | |
| --- | --- | --- | --- | --- | --- | --- | --- |
| 1390.9 | 1393.5 | 1415.0 | 1417.8 | 1420.5 | 1603.5 | 1639.3 | 1657.8 |
| 1661.5 | 1665.3 | 1669.1 | 1672.9 | 1676.7 | 1680.5 | 1684.4 | 1688.3 |
| 1692.2 | 1696.1 | 1732.1 | 1736.2 | 1740.3 | 1744.4 | 1748.6 | 1752.7 |
| 1756.9 | 1761.2 | 1765.4 | 1769.6 | 1773.9 | 1778.2 | 1782.5 | 1786.9 |
| 1791.2 | 1795.6 | 1800.0 | 1804.4 | 1808.9 | 1813.3 | 1817.8 | 1822.3 |
| 1826.9 | 1831.4 | 1836.0 | 1840.6 | 1845.2 | 1849.9 | 1854.5 | 1883.1 |
| 1887.9 | 1892.8 | 1897.7 | 1902.6 | 1907.5 | 1912.5 | 1963.6 | 1968.9 |
| 1974.2 | 2045.7 | 2051.4 | 2057.1 | 2062.9 | 2068.7 | 2074.6 | 2080.5 |
| 2086.4 | 2092.3 | 2098.3 | 2104.3 | 2110.3 | 2116.4 | 2122.5 | 2128.7 |
| 2134.9 | 2141.1 | 2147.4 | 2153.7 | 2160.0 | 2166.4 | 2198.8 | 2205.4 |
| 2212.0 | 2218.7 | 2287.9 | 2295.0 | 2302.2 | 2309.4 | 2316.7 | 2324.1 |
| 2331.4 | 2338.9 | 2346.3 | 2353.8 | 2361.4 | 2369.0 | 2431.8 |  |

| fat content model | | | | | | | |
| --- | --- | --- | --- | --- | --- | --- | --- |
| 1365.1 | 1367.6 | 1370.1 | 1471.7 | 1474.7 | 1477.7 | 1501.8 | 1504.9 |
| 1508.0 | 1511.1 | 1514.2 | 1542.9 | 1546.1 | 1549.4 | 1552.6 | 1555.9 |
| 1559.2 | 1562.6 | 1565.9 | 1569.2 | 1593.1 | 1596.5 | 1600.0 | 1603.5 |
| 1607.0 | 1610.5 | 1614.1 | 1654.1 | 1657.8 | 1661.5 | 1665.3 | 1669.1 |
| 1672.9 | 1676.7 | 1680.5 | 1684.4 | 1688.3 | 1692.2 | 1696.1 | 1700.0 |
| 1703.9 | 1707.9 | 1711.9 | 1715.9 | 1719.9 | 1723.9 | 1728.0 | 1732.1 |
| 1736.2 | 1740.3 | 1744.4 | 1748.6 | 1752.7 | 1756.9 | 1761.2 | 1765.4 |
| 1769.6 | 1773.9 | 1778.2 | 1782.5 | 1786.9 | 1791.2 | 1795.6 | 1800.0 |
| 1804.4 | 1808.9 | 1813.3 | 1817.8 | 1822.3 | 1826.9 | 1831.4 | 1836.0 |
| 1840.6 | 1845.2 | 1868.7 | 1873.5 | 1878.3 | 1883.1 | 1887.9 | 1892.8 |
| 1897.7 | 1902.6 | 1907.5 | 1912.5 | 1917.5 | 1922.5 | 1990.2 | 1995.7 |
| 2001.1 | 2006.6 | 2012.1 | 2017.6 | 2023.1 | 2028.7 | 2034.3 | 2040.0 |
| 2045.7 | 2051.4 | 2057.1 | 2062.9 | 2068.7 | 2074.6 | 2080.5 | 2086.4 |
| 2092.3 | 2098.3 | 2128.7 | 2134.9 | 2141.1 | 2147.4 | 2153.7 | 2160.0 |
| 2166.4 | 2172.8 | 2179.2 | 2185.7 | 2192.2 | 2198.8 | 2225.5 | 2232.2 |
| 2239.0 | 2245.9 | 2252.8 | 2259.7 | 2266.7 | 2273.7 | 2280.7 | 2287.9 |
| 2295.0 | 2302.2 | 2316.7 | 2324.1 | 2331.4 | 2338.9 | 2346.3 | 2353.8 |
| 2361.4 | 2369.0 | 2376.7 | 2384.4 | 2392.2 | 2400.0 | 2407.9 | 2415.8 |
| 2423.8 | 2431.8 | 2439.9 | 2448.0 | 2456.2 | 2464.4 | 2472.7 | 2481.1 |
| 2489.5 | 2498.0 | 2506.5 |  |  |  |  |  |

**Cont. Table S1.** Variables selected by Jack-Knife – InnoSpectra (nm)

| ash content model | | | | | | | |
| --- | --- | --- | --- | --- | --- | --- | --- |
| 1462.9 | 1465.9 | 1520.5 | 1523.7 | 1593.1 | 1596.5 | 1635.6 | 1639.3 |
| 1643.0 | 1740.3 | 1744.4 | 1748.6 | 1752.7 | 1756.9 | 1761.2 | 1765.4 |
| 1769.6 | 1773.9 | 1778.2 | 1782.5 | 1786.9 | 1813.3 | 1817.8 | 1822.3 |
| 1826.9 | 1831.4 | 1836.0 | 1840.6 | 1845.2 | 1849.9 | 2051.4 | 2057.1 |
| 2134.9 | 2141.1 | 2147.4 | 2153.7 | 2160.0 | 2166.4 | 2172.8 | 2179.2 |
| 2185.7 | 2384.4 | 2392.2 | 2400.0 |  |  |  |  |

**Table S2.** Variables selected by Jack-Knife – NeoSpectra (nm)

| protein content model | | | | | | | |
| --- | --- | --- | --- | --- | --- | --- | --- |
| 952.9 | 956.7 | 960.6 | 965.7 | 969.5 | 973.4 | 1000.2 | 1004.0 |
| 1007.8 | 1012.8 | 1119.9 | 1123.6 | 1127.3 | 1130.9 | 1134.6 | 1138.2 |
| 1141.9 | 1145.5 | 1150.4 | 1154.0 | 1157.7 | 1161.3 | 1164.9 | 1168.6 |
| 1172.2 | 1183.0 | 1186.6 | 1190.2 | 1195.0 | 1198.6 | 1202.2 | 1205.7 |
| 1209.3 | 1212.9 | 1216.4 | 1220.0 | 1296.1 | 1299.6 | 1303.1 | 1306.5 |
| 1444.7 | 1449.1 | 1468.7 | 1471.9 | 1498.9 | 1560.2 | 1563.3 | 1567.5 |
| 1570.6 |  |  |  |  |  |  |  |

| water content model | | | | | | | |
| --- | --- | --- | --- | --- | --- | --- | --- |
| 933.5 | 937.4 | 941.2 | 945.1 | 949.0 | 952.9 | 956.7 | 1145.5 |
| 1150.4 | 1154.0 | 1157.7 | 1161.3 | 1164.9 | 1168.6 | 1172.2 | 1175.8 |
| 1179.4 | 1183.0 | 1186.6 | 1209.3 | 1212.9 | 1216.4 | 1220.0 | 1223.6 |
| 1227.1 | 1230.7 | 1234.2 | 1238.9 | 1242.5 | 1246.0 | 1274.1 | 1277.6 |
| 1282.2 | 1285.7 | 1289.2 | 1421.6 | 1489.2 | 1495.6 | 1595.4 | 1598.5 |
| 1601.6 | 1605.7 | 1608.8 |  |  |  |  |  |

| fat content model | | | | | | | |
| --- | --- | --- | --- | --- | --- | --- | --- |
| 921.8 | 941.2 | 945.1 | 949.0 | 981.1 | 984.9 | 988.7 | 992.5 |
| 996.3 | 1000.2 | 1004.0 | 1007.8 | 1012.8 | 1016.6 | 1020.4 | 1024.2 |
| 1028.0 | 1031.8 | 1035.5 | 1039.3 | 1116.2 | 1119.9 | 1123.6 | 1150.4 |
| 1154.0 | 1157.7 | 1161.3 | 1164.9 | 1168.6 | 1172.2 | 1175.8 | 1179.4 |
| 1183.0 | 1186.6 | 1190.2 | 1195.0 | 1198.6 | 1202.2 | 1205.7 | 1212.9 |
| 1216.4 | 1220.0 | 1223.6 | 1227.1 | 1230.7 | 1234.2 | 1238.9 | 1242.5 |
| 1246.0 | 1249.5 | 1253.0 | 1256.6 | 1260.1 | 1263.6 | 1267.1 | 1270.6 |
| 1274.1 | 1277.6 | 1282.2 | 1285.7 | 1289.2 | 1292.7 | 1296.1 | 1299.6 |
| 1303.1 | 1306.5 | 1310.0 | 1313.4 | 1316.9 | 1424.9 | 1431.5 | 1434.8 |
| 1444.7 | 1449.1 | 1452.4 | 1455.6 | 1547.6 | 1550.8 | 1557.1 | 1560.2 |
| 1683.2 | 1686.1 |  |  |  |  |  |  |

| ash content model | | | | | | | |
| --- | --- | --- | --- | --- | --- | --- | --- |
| 949.0 | 952.9 | 956.7 | 1000.2 | 1004.0 | 1007.8 | 1012.8 | 1016.6 |
| 1020.4 | 1024.2 | 1123.6 | 1127.3 | 1130.9 | 1134.6 | 1183.0 | 1186.6 |
| 1190.2 | 1195.0 | 1198.6 | 1202.2 | 1205.7 | 1209.3 | 1320.3 | 1324.9 |
| 1328.3 | 1331.8 | 1335.2 | 1342.0 | 1345.4 | 1348.8 | 1352.2 | 1355.6 |
| 1444.7 | 1514.9 | 1608.8 |  |  |  |  |  |

|  |  |
| --- | --- |
|  |  |

**Fig. S1** Comparative results for protein content determined by the reference method and predicted by the NIR-based models for InnoSpectra (A, B) and NeoSpectra (C, D). (A, C) results for the full spectrum-based models; (B, open squares; D open triangles) model with variable selection using jack-knife; (B, filled circles; D, filled diamonds) results for validation with external samples of the model built with the selected variables

|  |  |
| --- | --- |
|  |  |

**Fig. S2** Comparative results for water content determined by the reference method and predicted by the NIR-based models for InnoSpectra (A, B) and NeoSpectra (C, D). (A, C) results for the full spectrum-based models; (B, open squares; D open triangles) models with variable selection using jack-knife; (B, filled circles; D, filled diamonds) validation with external samples of the models built with the selected variables

|  |  |
| --- | --- |
|  |  |

**Fig. S3** Comparative results for fat content determined by the reference method and predicted by the NIR-based models for InnoSpectra (A, B) and NeoSpectra (C, D). (A, C) results for the full spectrum-based models; (B, open squares; D open triangles) models with variable selection using jack-knife; (B, filled circles; D, filled diamonds) validation with external samples of the models built with the selected variables

|  |  |
| --- | --- |
|  |  |

**Fig. S4** Comparative results for ash content determined by the reference method and predicted by the NIR-based models for InnoSpectra (A, B) and NeoSpectra (C, D). (A, C) results for the full spectrum-based models; (B, open squares; D open triangles) models with variable selection using jack-knife; (B, filled circles; D, filled diamonds) validation with external samples of the models built with the selected variables

|  |  |
| --- | --- |

**Fig. S5** Regression coefficients of the PLS models constructed using the NeoSpectra instrument for water (in black) and fat (in red) content. (A) using all available variables; (B) using the variables selected by the jack-knife algorithm. In (B) the variables with zero values have been eliminated by the selection algorithm
